# Supplementary material
Source: ML conference proceedings conference paper supplement (https://openaccess.thecvf.com/content/ACCV2022/html/Cai_RGB_Road_Scene_ACCV_2022_paper.html)
Supplement: Supplementary file 1 [file Cai_RGB_Road_Scene_ACCV_2022_supplemental.pdf]

# RGB Road Scene Material Segmentation

## SUPPLEMENTARY DOCUMENT

Sudong Cai<sup>[0000–0002–5446–5618]</sup>, Ryosuke Wakaki<sup>[0000–0003–3917–9012]</sup>,  
Shohei Nobuhara<sup>[0000–0002–3204–8696]</sup>, and Ko Nishino<sup>[0000–0002–3534–3447]</sup>

Graduate School of Informatics, Kyoto University, Kyoto, Japan  
<https://vision.ist.i.kyoto-u.ac.jp/>

### 1 KITTI-Materials Dataset

KITTI-Materials dataset consists of 1000 images covering 24 different road scenes of downtown, campus, residential area, highway, and other cityscapes. Figure 1 shows an example of the various types of road scene images with their corresponding material annotations. Table 1 reports the detailed per-class pixel statistics of each scene (with scene IDs), where material categories “sand,” “gravel,” and “water” only show up in very few scenes and are comparatively rare due to the natural long-tail distribution of road scene materials.

For evaluation on KITTI-materials, we define two training-test data splits (*i.e.*, Split-1 and Split-2), where the test set of Split-1 (consists of scenes 0926019, 0926086, 0930034, and 1003047) contains more scenes with highways and rural areas while Split-2 (consists of scenes 0926064, 0926095, 0929004, and 0930016) is biased to city scenes. Both splits contain all 1000 images of KITTI-Materials, where 800 images are for training and 200 images are for testing, but with different combinations of scenes. Figure 2 shows the different characteristics of Split-1 and -2 with example images, and Table 1 reports the per-class statistics of them. Both training and test sets of these two splits show very strong imbalance in the material categories. Note that researchers can define their tailored split policies for their experiments after we publicly disseminate the KITTI-Materials dataset. That said, as some of the materials only appear in images of a few scenes, splits with all material categories in both train and test sets are hard to realize when based on scenes except for the suggested Split-1 and -2.

Table 2 shows the statistical properties of KITTI-Materials and other related street-view material (*i.e.*, MCubeS [4]) and semantic segmentation datasets (*i.e.*, Cityscapes [3], Daimler Urban Segmentation (DUS) [5], and KITTI Semantic Segmentation (KITTI-SS) [1]), where only KITTI-Materials and MCubeS provide dense material annotations. In contrast to MCubeS which comprises rare suburban scenes, our KITTI-Materials is comprised of diverse images of city and suburban landscapes with a broader city-scale sampling range. KITTI-Materials has higher annotation density compared to road scene semantic segmentation datasets (Cityscapes, DUS, and KITTI-SS), which ensures high quality material annotations for realistic driving view images.

**Table 1.** Per-class pixel statistics for each scene in KITTI-Materials dataset. “Scn ID” and “Imgs” denote “Scene ID” and “Images,” respectively; “road mk,” “fab, lthr,” “rubr, vl,” “cob,” and “hum bd” denote “road marking,” “fabric, leather,” “rubber, vinyl,” “cobblestone,” and “human body,” respectively. Note that scene-0926095 includes an invalid pixel. “Trn-1, -2” and “Tst-1, -2” denote training and test sets of Split-1 and -2, respectively.

| Scn ID  | Imgs | asphalt | concrete | metal  | road mk | fab, lthr | glass | plaster | plastic | rubr, vl | sand | gravel | ceramic | cob    | brick | grass  | wood  | leaf   | water | hum bd | sky   | Pixels |
|---------|------|---------|----------|--------|---------|-----------|-------|---------|---------|----------|------|--------|---------|--------|-------|--------|-------|--------|-------|--------|-------|--------|
| 0926002 | 1    | 83K     | 58K      | 13K    | 4125    | 17K       | 2314  | 0       | 0       | 3656     | 0    | 0      | 1018    | 0      | 20K   | 8919   | 566   | 137K   | 0     | 1035   | 39K   | 389K   |
| 0926019 | 50   | 2575K   | 501K     | 391K   | 23K     | 794       | 38K   | 0       | 3165    | 4850     | 0    | 0      | 0       | 0      | 207K  | 5579K  | 71K   | 9375K  | 308   | 95     | 686K  | 19M    |
| 0926039 | 50   | 2478K   | 472K     | 3039K  | 0       | 5297      | 1186K | 6814K   | 85K     | 128K     | 0    | 0      | 411K    | 1158K  | 643K  | 375    | 16K   | 2107K  | 0     | 1954   | 911K  | 19M    |
| 0926048 | 5    | 0       | 162K     | 326K   | 0       | 0         | 258K  | 768K    | 8725    | 11K      | 0    | 0      | 9232    | 0      | 274K  | 5945   | 905   | 29K    | 0     | 0      | 93K   | 1946K  |
| 0926056 | 50   | 4340K   | 1237K    | 1517K  | 298K    | 11K       | 369K  | 188K    | 24K     | 26K      | 0    | 22K    | 114K    | 0      | 149K  | 2025K  | 723K  | 6934K  | 0     | 3170   | 1475K | 19M    |
| 0926059 | 50   | 2635K   | 744K     | 2715K  | 341K    | 18K       | 821K  | 3175K   | 107K    | 115K     | 0    | 0      | 264K    | 1390K  | 701K  | 1481K  | 147K  | 3731K  | 0     | 4795   | 1066K | 19M    |
| 0926064 | 50   | 2228K   | 4846K    | 2390K  | 7939    | 22K       | 745K  | 0       | 65K     | 88K      | 0    | 0      | 363K    | 1175   | 707K  | 44K    | 117K  | 7234K  | 714   | 7907   | 590K  | 19M    |
| 0926070 | 50   | 3251K   | 1576K    | 595K   | 264K    | 2611      | 87K   | 477K    | 25K     | 11K      | 0    | 0      | 75K     | 0      | 34K   | 4441K  | 416K  | 7144K  | 0     | 1489   | 1054K | 19M    |
| 0926079 | 20   | 947K    | 316K     | 357K   | 0       | 0         | 97K   | 888K    | 4578    | 3582     | 0    | 0      | 39K     | 676K   | 0     | 343K   | 81K   | 3924K  | 0     | 0      | 106K  | 7782K  |
| 0926084 | 50   | 4444K   | 3761K    | 2519K  | 263K    | 13K       | 702K  | 0       | 55K     | 111K     | 0    | 0      | 67K     | 1190K  | 73K   | 576K   | 441K  | 4679K  | 0     | 3659   | 557K  | 19M    |
| 0926086 | 50   | 2203K   | 1478K    | 3582K  | 7604    | 25K       | 87K   | 2417K   | 119K    | 17K      | 0    | 1797   | 238K    | 508K   | 376K  | 1193K  | 253K  | 5785K  | 0     | 3874   | 1163K | 19M    |
| 0926091 | 50   | 0       | 3967K    | 2603K  | 68K     | 519K      | 1260K | 2399K   | 104K    | 139K     | 6789 | 0      | 298K    | 4781K  | 298K  | 41K    | 59K   | 2366K  | 0     | 80044  | 468K  | 19M    |
| 0926095 | 50   | 2802K   | 500K     | 2808K  | 62K     | 89K       | 1115K | 4797K   | 59K     | 120K     | 5604 | 0      | 155K    | 1584K  | 2589K | 124K   | 281K  | 1930K  | 0     | 31440  | 404K  | 19M    |
| 0926117 | 50   | 2808K   | 1270K    | 2641K  | 4468    | 57K       | 771K  | 0       | 54K     | 97K      | 25K  | 0      | 3580    | 643K   | 550K  | 1953K  | 544K  | 7699K  | 0     | 4311   | 320K  | 19M    |
| 0928037 | 15   | 366K    | 311K     | 794K   | 1668    | 192K      | 81K   | 125K    | 5065    | 63K      | 0    | 0      | 1282    | 1254K  | 217K  | 37K    | 126K  | 2107K  | 0     | 47515  | 108K  | 5837K  |
| 0928045 | 9    | 374     | 9552     | 154K   | 0       | 85K       | 415K  | 0       | 633     | 916      | 0    | 0      | 0       | 782K   | 521K  | 82K    | 511K  | 894K   | 0     | 11971  | 34K   | 3502K  |
| 0929004 | 50   | 2689K   | 602K     | 1220K  | 251K    | 0         | 487K  | 0       | 33K     | 54K      | 0    | 0      | 0       | 0      | 0     | 3400K  | 376K  | 9648K  | 0     | 0      | 696K  | 19M    |
| 0930016 | 50   | 4053K   | 638K     | 854K   | 593K    | 0         | 50K   | 190K    | 15K     | 11K      | 0    | 3497   | 175K    | 24K    | 1048K | 1608K  | 74K   | 8762K  | 0     | 0      | 1356K | 19M    |
| 0930020 | 50   | 2487K   | 1751K    | 3302K  | 20K     | 26K       | 177K  | 486K    | 30K     | 70K      | 269K | 0      | 389K    | 1202K  | 48K   | 2866K  | 455K  | 3489K  | 0     | 4965   | 2385K | 19M    |
| 0930033 | 50   | 2912K   | 168K     | 287K   | 103K    | 9962      | 12K   | 117K    | 2083    | 5772     | 387  | 0      | 61K     | 847K   | 5901  | 2499K  | 90K   | 10562K | 0     | 1541   | 1772K | 19M    |
| 0930034 | 50   | 742K    | 756K     | 373K   | 1545    | 0         | 45K   | 845K    | 32K     | 7065     | 17K  | 0      | 215K    | 1313K  | 275K  | 2365K  | 795K  | 10558K | 0     | 0      | 1116K | 19M    |
| 1003034 | 50   | 3951K   | 777K     | 660K   | 166K    | 0         | 89K   | 95K     | 12K     | 17K      | 0    | 36K    | 13842   | 1377K  | 40K   | 2570K  | 594K  | 8145K  | 0     | 0      | 912K  | 19M    |
| 1003042 | 50   | 3957K   | 719K     | 1585K  | 455K    | 0         | 61K   | 9931    | 6069    | 15K      | 0    | 0      | 0       | 0      | 0     | 2646K  | 2508  | 7321K  | 0     | 0      | 2677K | 19M    |
| 1003047 | 50   | 3902K   | 4854     | 2488K  | 184K    | 0         | 481K  | 0       | 71K     | 134K     | 0    | 0      | 0       | 0      | 0     | 670K   | 3498  | 8398K  | 0     | 0      | 3120K | 19M    |
| Total   | 1K   | 56M     | 27M      | 37M    | 3121K   | 1092K     | 9437K | 24M     | 920K    | 1253K    | 323K | 63K    | 2891K   | 19M    | 8782K | 37M    | 6178K | 133M   | 1022  | 210K   | 23M   | 389M   |
| Trn-1   | 800  | 46M     | 24M      | 30M    | 2904K   | 1066K     | 8786K | 20530M  | 695K    | 1090K    | 306K | 61K    | 2438K   | 16910K | 7924K | 26751M | 5055K | 99M    | 714   | 206K   | 17M   | 311M   |
| Tst-1   | 200  | 9422K   | 2739K    | 6833K  | 217K    | 26K       | 651K  | 3262K   | 225K    | 163K     | 17K  | 1797   | 453K    | 1820K  | 859K  | 9807M  | 1123K | 34M    | 308   | 3969   | 6085K | 78M    |
| Trn-2   | 800  | 44M     | 20M      | 29942K | 2206K   | 981K      | 7040K | 19M     | 748K    | 980K     | 318K | 60K    | 2198K   | 17M    | 4439K | 31M    | 5330K | 105M   | 308   | 170K   | 20M   | 311M   |
| Tst-2   | 200  | 12M     | 6587K    | 7271K  | 914K    | 111K      | 2397K | 4987K   | 172K    | 273K     | 5604 | 3497   | 693K    | 1609K  | 435K  | 5175K  | 848K  | 28M    | 714   | 39K    | 3046K | 78M    |

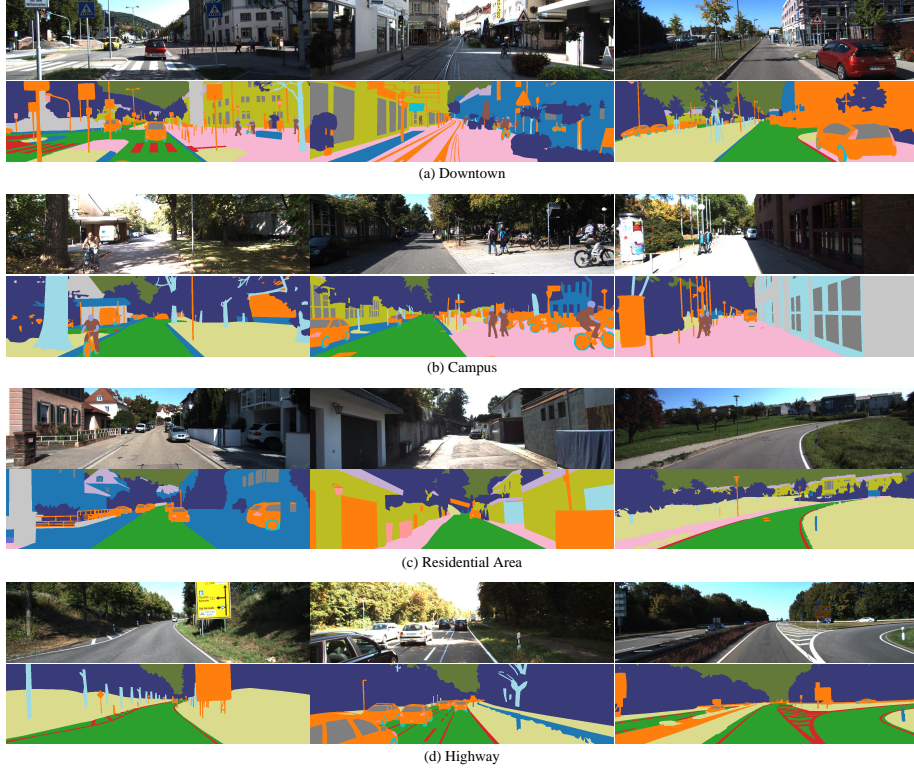

**Fig. 1.** Example images and their corresponding material annotations from the KITTI-materials dataset. From top to bottom are examples regarding “downtown,” “campus,” “residential area,” and “highway,” respectively.

## 2 Per-Class Evaluation

In Table 3, we report detailed per-class results for 20 material categories on Split-1 and Split-2 of KITTI-Materials.

Our results on Split-1 shows that our RMSNet yields the best results on most material classes including “asphalt,” “concrete,” “metal,” “road marking,” “fabric, vinyl,” “glass,” “plaster,” “rubber, vinyl,” “cobblestone,” “brick,” “wood,” “human, body,” and “sky,” where RMSNet introduces clear gains on “asphalt,” “road marking,” “rubber, vinyl,” “plaster,” “metal,” “cobblestone,” “brick,” “wood,” and “human, body,” which are materials critical in road scene understanding.

As seen in results on Split-2, our method shows highest accuracies on most of the material classes, where it achieves clear improvements on “metal,” “glass,” “rubber, vinyl,” “plastic,” “plaster,” “ceramic,” “grass,” “wood,” and “human body,” which are common material categories in city road scenes.

**Table 2.** Statistical properties of KITTI-Materials and other street-view material/semantic segmentation datasets. “img.,” “Ann.,” “Mat.,” and “cls” denote “image,” “annotation,” “material,” and “classes” respectively; “Suburban” denotes “suburban scenes” and “CS samp.,” denotes “city-scale sampling;” “✓” means “yes or applicable” while “–” denotes “no or Non-Applicable (N/A);” “KITTI-SS” and “KITTI-Mats” denote KITTI Semantic Segmentation and our KITTI-Materials datasets, respectively.

| Dataset    | #Imgs | #Img size          | #Ann. den | Mat. | #Mat. cls | Suburban | CS samp.                     | #Ann. pixels |
|------------|-------|--------------------|-----------|------|-----------|----------|------------------------------|--------------|
| MCubeS     | 500   | $1224 \times 1024$ | > 99.0%   | ✓    | 20        | Rare     | – ( $\approx 4\text{KM}^2$ ) | 627M         |
| Cityscapes | 5000  | $2048 \times 1024$ | 97.1%     | –    | –         | ✓        | ✓                            | 9400M        |
| DUS        | 500   | $1024 \times 440$  | 63.0%     | –    | –         | Rare     | N/A                          | 140M         |
| KITTI-SS   | 400   | $1242 \times 375$  | 88.9%     | –    | –         | ✓        | ✓                            | 230M         |
| KITTI-Mats | 1,000 | $1216 \times 320$  | > 99.0%   | ✓    | 20        | ✓        | ✓                            | 389M         |

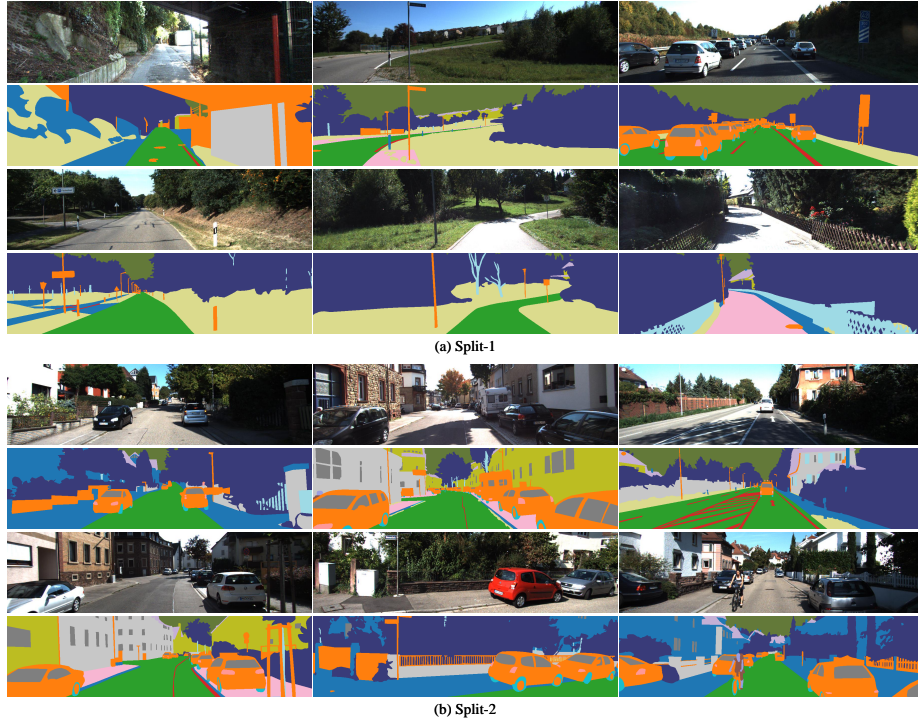

**Fig. 2.** Visual examples of the test sets of (a) Split-1 and (b) Split-2.

**Table 3.** Per-class comparative results of our models and other methods on KITTI-Materials. “road mk,” “fab, lthr,” “rubr, vl,” “cob,” and “hum bd” denote “road marking,” “fabric, leather,” “rubber, vinyl,” “cobblestone,” and “human body,” respectively. “DLv3+” and “SegF” denote raw DeepLabv3+ and SegFormer, respectively.

| Method        | Split        | asphalt      | concrete     | metal        | road mk      | fab, lthr    | glass        | plaster      | plastic      | rubr, vl     | sand        | gravel | ceramic      | cob          | brick        | grass        | wood         | leaf         | water | hum bd       | sky          | mean         |
|---------------|--------------|--------------|--------------|--------------|--------------|--------------|--------------|--------------|--------------|--------------|-------------|--------|--------------|--------------|--------------|--------------|--------------|--------------|-------|--------------|--------------|--------------|
| DLv3+ [2]     |              | 79.58        | 29.29        | 56.74        | 53.74        | 34.03        | 50.55        | 44.07        | 30.88        | 40.51        | 0           | 0      | 41.60        | 40.53        | 26.55        | <b>71.50</b> | 30.29        | <b>85.92</b> | 0     | 20.24        | 91.03        | 41.35        |
| SegF [6]      |              | 82.67        | 28.47        | 57.81        | 58.59        | 36.46        | 60.54        | 48.36        | <b>43.83</b> | 47.09        | 0           | 0      | <b>48.28</b> | 51.85        | 25.54        | 65.91        | 31.32        | 83.70        | 0     | 24.38        | 94.54        | 44.47        |
| <b>RMSNet</b> | <sup>1</sup> | <b>85.14</b> | <b>29.58</b> | <b>58.66</b> | <b>60.65</b> | <b>46.69</b> | <b>60.75</b> | <b>56.12</b> | 42.91        | <b>48.79</b> | 0           | 0      | 45.47        | <b>57.62</b> | <b>31.25</b> | 69.62        | <b>35.47</b> | 85.31        | 0     | <b>27.55</b> | <b>94.89</b> | <b>46.82</b> |
| DLv3+ [2]     |              | 85.66        | 15.79        | 60.24        | 54.33        | 48.16        | 62.82        | 41.95        | 40.35        | 41.06        | <b>0.28</b> | 0      | 53.01        | 33.63        | <b>50.12</b> | 77.82        | 35.21        | 90.42        | 0     | 38.32        | 92.62        | 46.09        |
| SegF [6]      |              | 85.08        | <b>22.87</b> | 60.43        | 56.99        | <b>55.61</b> | 64.86        | 38.24        | 42.48        | 44.72        | 0           | 0      | 54.24        | <b>52.38</b> | 40.60        | 76.48        | 38.30        | 91.03        | 0     | 48.22        | <b>93.80</b> | 48.32        |
| <b>RMSNet</b> | <sup>2</sup> | <b>86.51</b> | 22.84        | <b>61.81</b> | <b>58.51</b> | 52.56        | <b>67.17</b> | <b>48.12</b> | <b>48.50</b> | <b>47.87</b> | 0           | 0      | <b>60.80</b> | 51.05        | 47.72        | <b>79.19</b> | <b>40.77</b> | <b>91.31</b> | 0     | <b>49.10</b> | 92.93        | <b>50.34</b> |

## References

1. Abu Alhaija, H., Mustikovela, S.K., Mescheder, L., Geiger, A., Rother, C.: Augmented Reality Meets Computer Vision: Efficient Data Generation for Urban Driving Scenes. *IJCV* **126**(9), 961–972 (2018)
2. Chen, L.C., Zhu, Y., Papandreou, G., Schroff, F., Adam, H.: Encoder-Decoder with Atrous Separable Convolution for Semantic Image Segmentation. In: *Proc. ECCV*. pp. 833–851 (2018)
3. Cordts, M., Omran, M., Ramos, S., Rehfeld, T., Enzweiler, M., Benenson, R., Franke, U., Roth, S., Schiele, B.: The Cityscapes Dataset for Semantic Urban Scene Understanding. In: *Proc. CVPR*. pp. 3213–3223 (2016)
4. Liang, Y., Wakaki, R., Nobuhara, S., Nishino, K.: Multimodal Material Segmentation. In: *Proc. CVPR* (2022)
5. Scharwächter, T., Enzweiler, M., Franke, U., Roth, S.: Efficient Multi-cue Scene Segmentation. In: *German Conference on Pattern Recognition* (2013)
6. Xie, E., Wang, W., Yu, Z., Anandkumar, A., Alvarez, J.M., Luo, P.: Segformer: Simple and Efficient Design for Semantic Segmentation with Transformers. In: *Proc. NeurIPS* (2021)
